# Supplementary material for: Membrane aberrancy and unfolded proteins activate the endoplasmic reticulum stress sensor Ire1 in different ways
Source: PubMed Central journal article supplement — Mol Biol Cell. 2011 Sep 15;22(18):3520–32. doi: 10.1091/mbc.E11-04-0295 (PMC3172275; doi:10.1091/mbc.e11-04-0295), 2011-09-15
Supplement: supp_E11-04-0295_CombinedSupMats.pdf [file supp_E11-04-0295_CombinedSupMats.pdf]

# Figure S1

## A Wild-type and $\Delta III$ Ire1

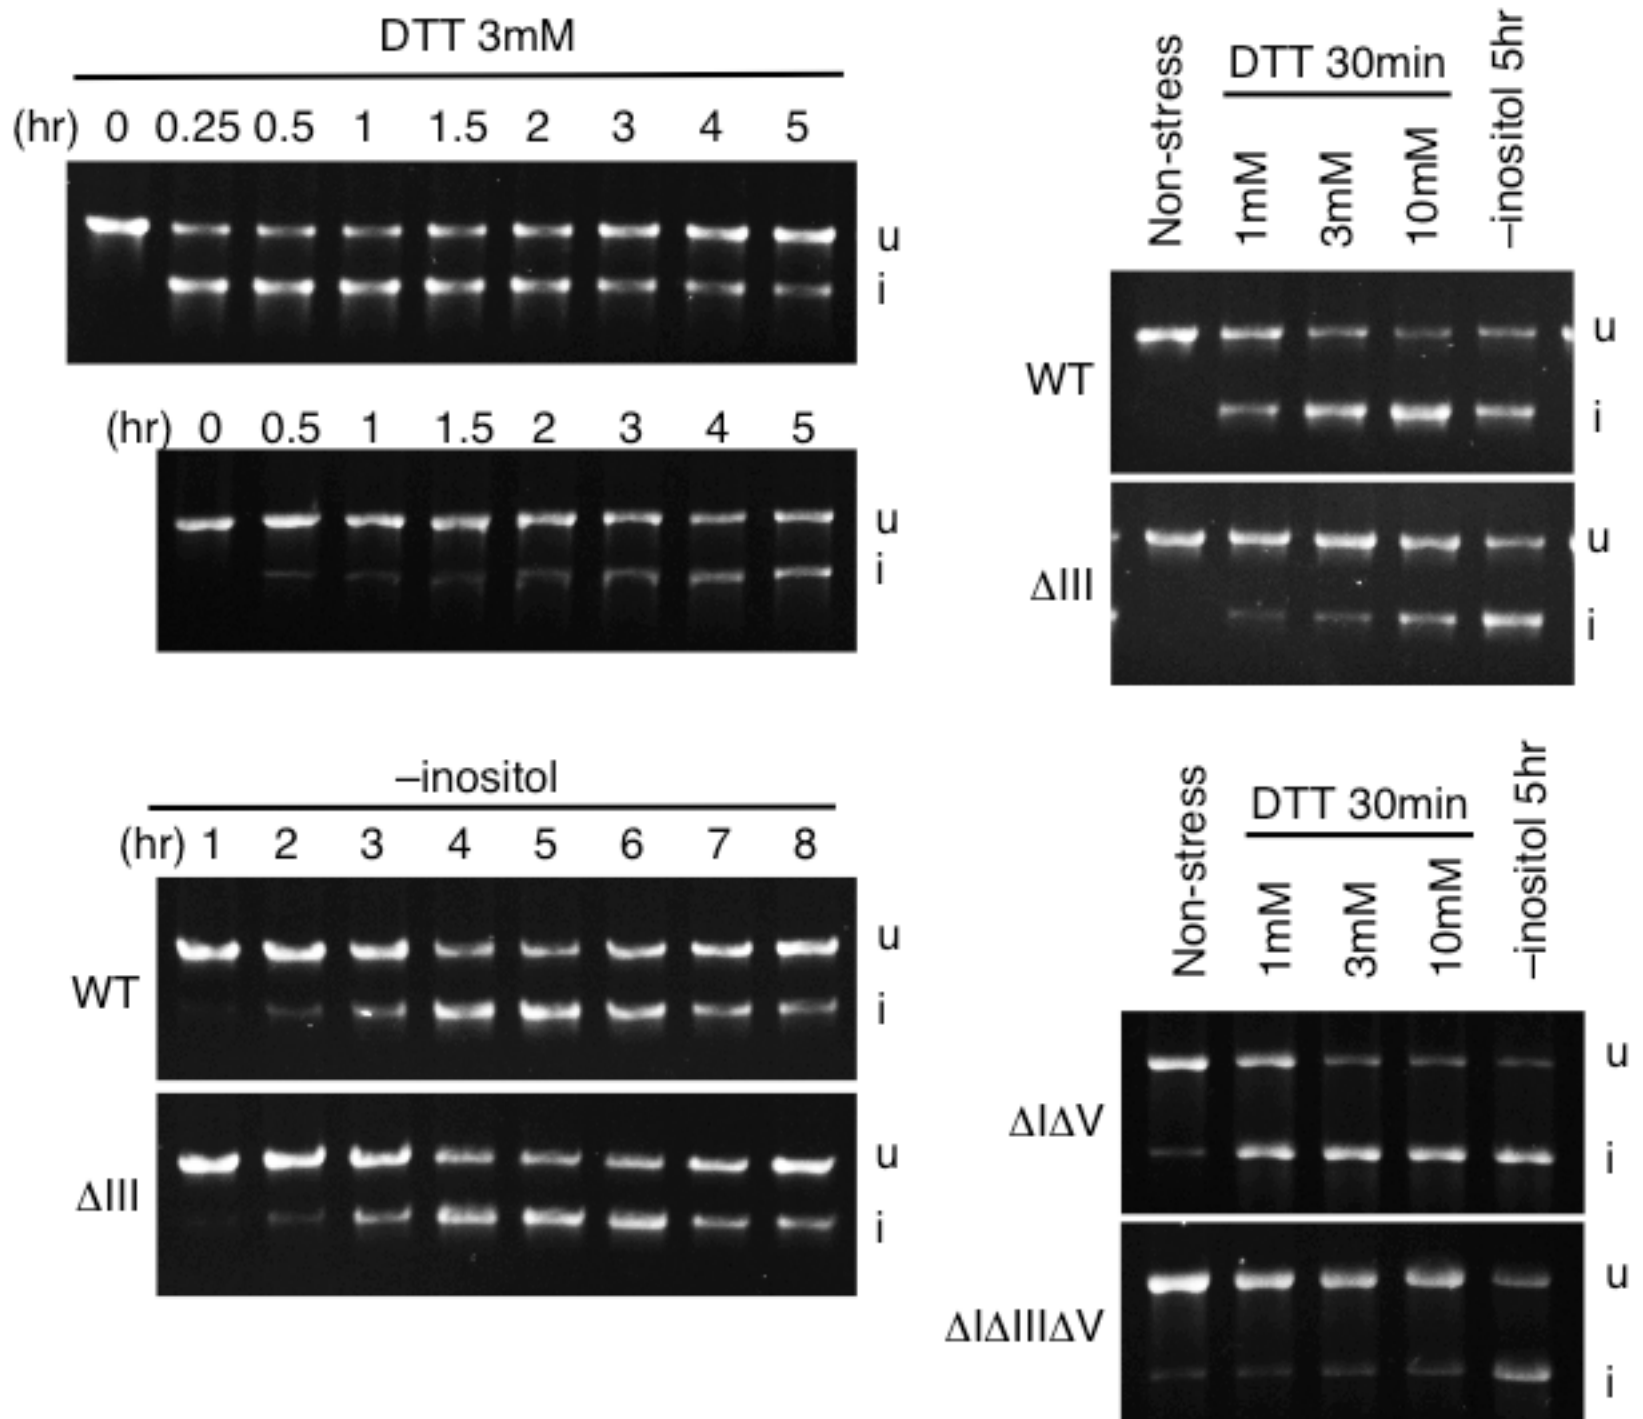

## B bZip-Ire1

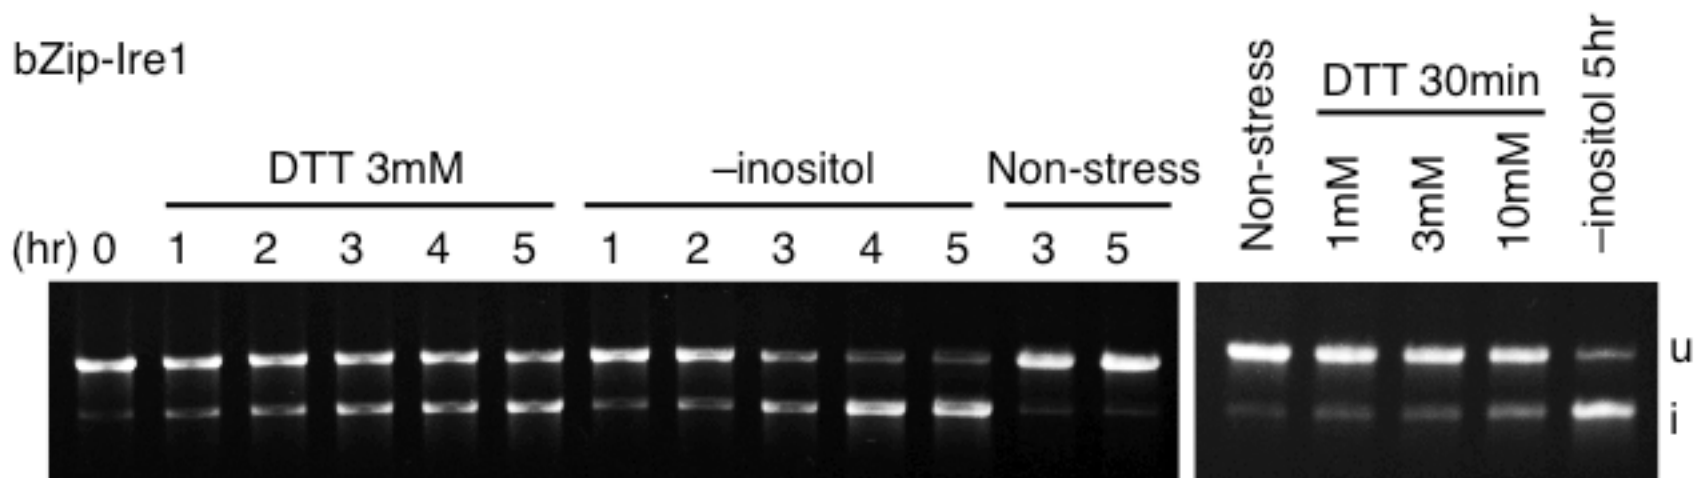

Figure S1 Raw-data examples for monitoring the *HAC1* mRNA splicing.

The *ire1Δ* cells KMY1516 carrying the *IRE1* gene (WT) or its mutants (on plasmid pRS313-IRE1 or its mutants) were stressed by the indicated stimuli, and total RNA samples were subjected to RT-PCR to amplify the *HAC1* products (*HAC1<sup>u</sup>* (u) and *HAC1<sup>i</sup>* (i)), which were then fractionated by 2% agarose-gel electrophoresis and visualized by EtBr staining.

## Figure S2

*ire1* $\Delta$  cells

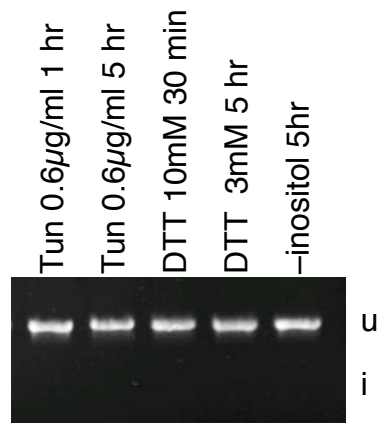

Figure S2 *ire1* $\Delta$  cells do not exhibit splicing of the *HAC1* mRNA.

The *ire1* $\Delta$  cells KMY1516 were stressed by the indicated stimuli, and total RNA samples were subjected to RT-PCR to amplify the *HAC1* products (*HAC1*<sup>u</sup> (u) and *HAC1*<sup>i</sup> (i)), which were then fractionated by 2% agarose-gel electrophoresis and visualized by EtBr staining.

Figure S3

A

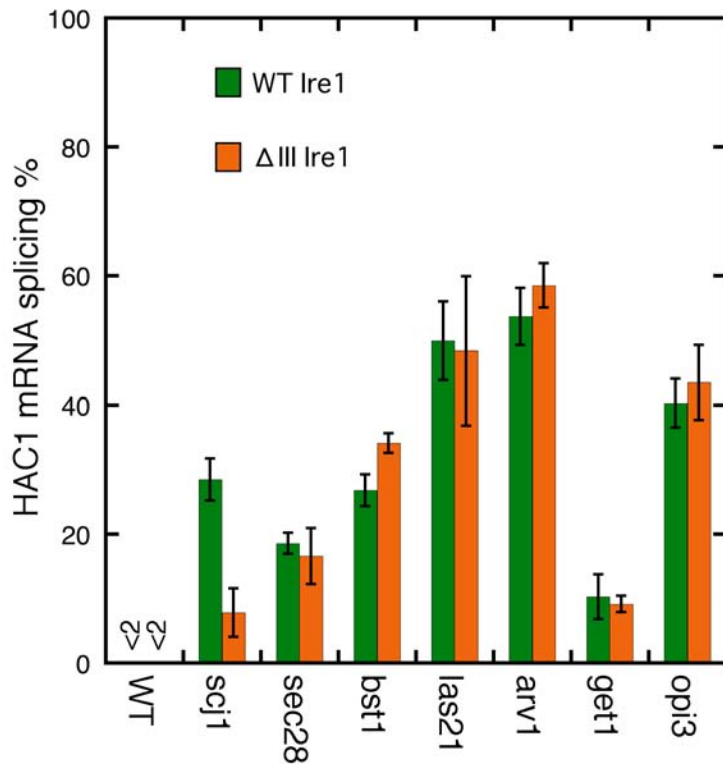

B

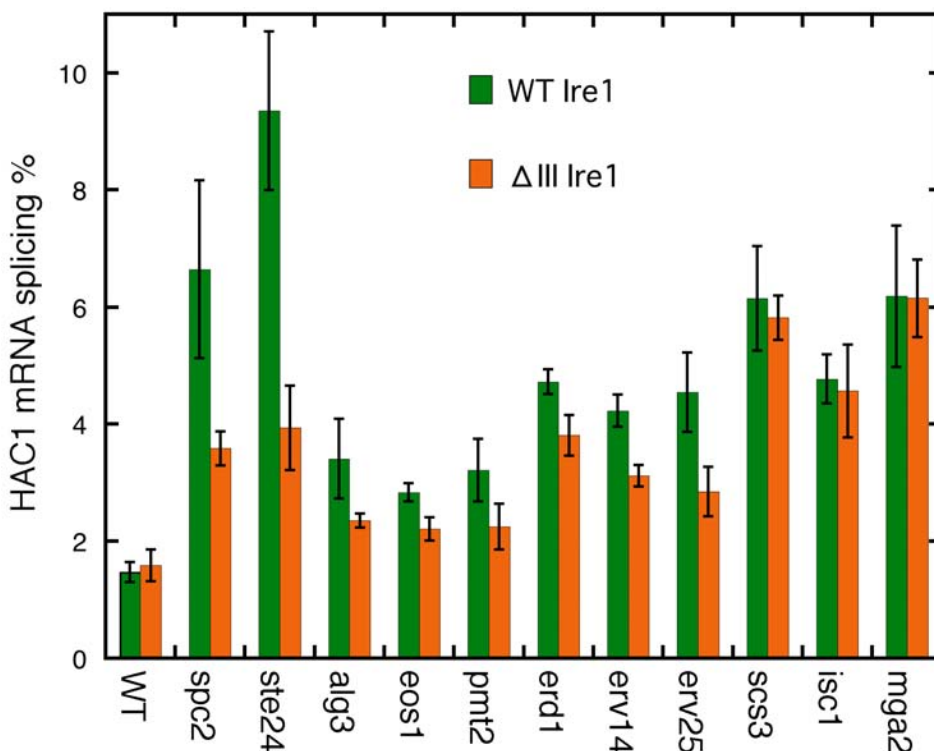

Figure S3 *HAC1* mRNA splicing induced by gene deletions.

Total RNA samples obtained from the strains employed in Figure 8 were analyzed by RT-PCR to evaluate splicing efficiency of the *HAC1* mRNA. In A, the RT-PCR products were conventionally fractionated by EtBr-containing gels, while in order to detect weak *HAC1*<sup>i</sup> signal, we employed a fluorescent dye-labeled PCR primer in B. Error bars represent the standard deviations from three independent transformants.

Figure S4

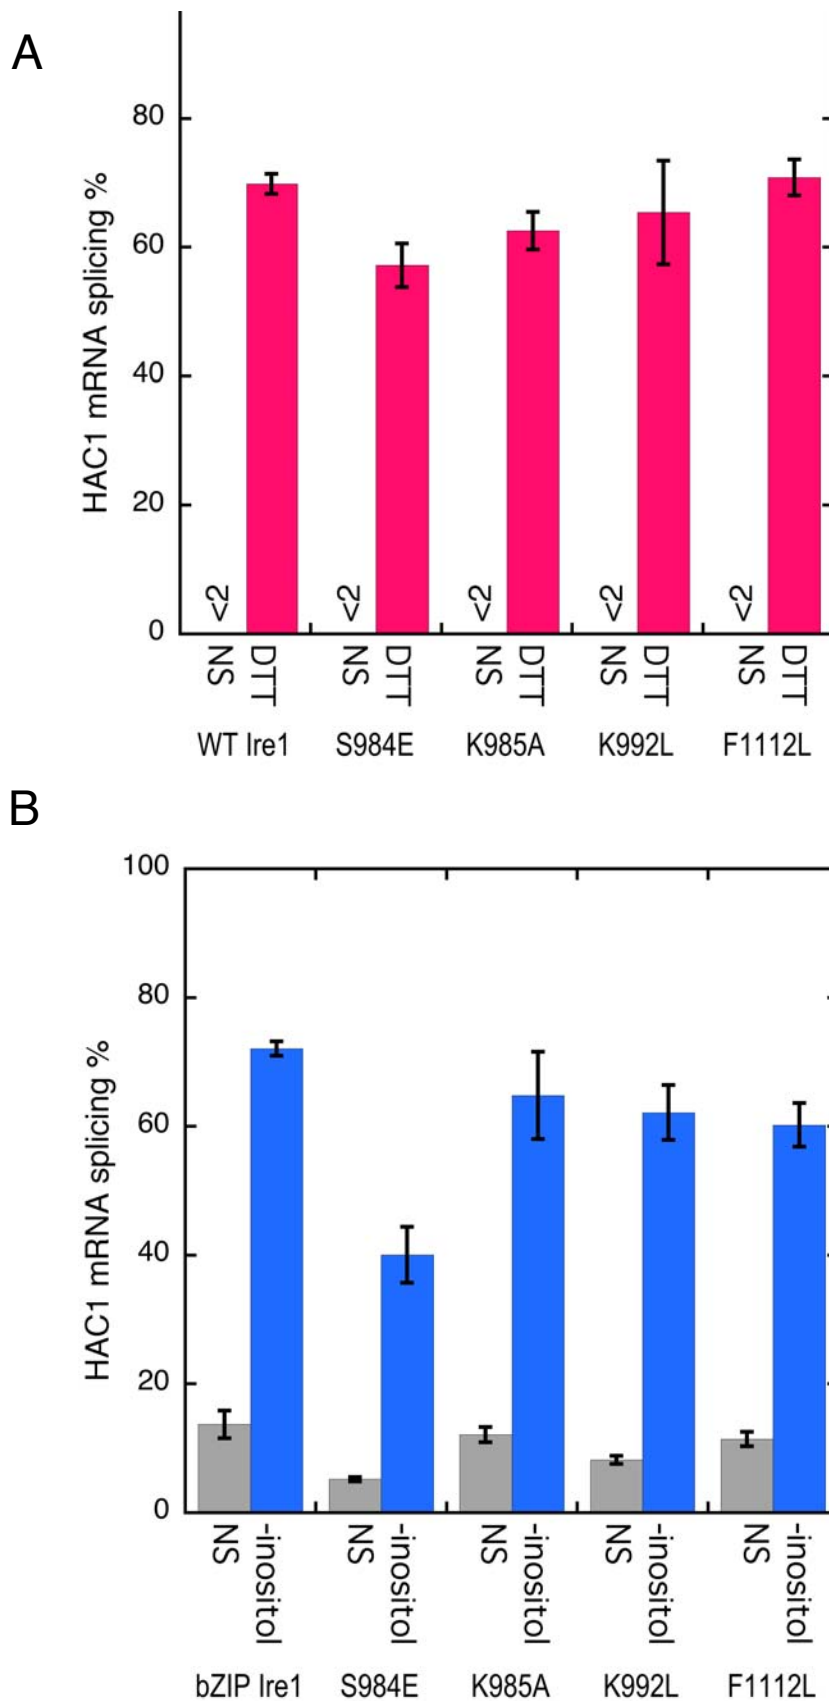

Figure S4 Activity of wild-type and bZIP-Ire1 carrying the quercetin-non-responding mutations.

The *ire1Δ* strain KMY1516 transformed with the wild-type IRE1 (A) or the bZIP-Ire1 (B) plasmid carrying the indicated mutations (pRS313-IRE1 or its derivatives) were cultured under non-stress conditions (NS) or stressed by DTT treatment (A; 3mM for 30 min) or inositol depletion (B; 5 hr) before RT-PCR amplification of the *HAC1* products from total RNA samples. Error bars represent the standard deviations from three independent transformants.

Table S1 Oligonucleotide primers to generate CPY and CPY\* plasmids.

| Sequence                                              | Target                       | Direction | Attached restriction site |
|-------------------------------------------------------|------------------------------|-----------|---------------------------|
| atatatata <b>gcggccgc</b> ATAGCTTCAAAAATGTTCTACTCC    | TEF1 promoter                | Forward   | Not I                     |
| atatata <b>actagt</b> AAACTTAGATTAGATTGGCTATGCT       | TEF1 promoter                | Reverse   | Spe I                     |
| atatat <b>gcggccgc</b> ACGGATTAGAAAGCCGCCGAGC         | GAL1 promoter                | Forward   | Not I                     |
| atata <b>actagt</b> GGTTTCTCTCCCTTGACCGTTAAAGTATAGAGG | GAL1 promoter                | Reverse   | Spe I                     |
| gtt <b>taactagt</b> AAATGAAGCATTCACCAGTTTACTATGTGG    | CPY or CPY* (PRC1 or prc1-1) | Forward   | Spe I                     |
| tt <b>taagaatt</b> CTAAGGAAACCACCGTGGATCCAT           | CPY or CPY* (PRC1 or prc1-1) | Reverse   | Eco RI                    |
| ggttt <b>agaatt</b> cAAAGGTGAAGAATTATTCACTGGTGTG      | GFP                          | Forward   | Eco RI                    |
| tt <b>aaactcga</b> GTATTGTATCAATTCCATACCATG           | GFP                          | Reverse   | Xho I                     |

The hybridizing sequences appear as capital letters.

The introduced restriction sites are highlighted by red letters.

**Table S2 Antibodies used in this study.**

| Description                                    | Working concentration        | Purpose                    | Source                              |
|------------------------------------------------|------------------------------|----------------------------|-------------------------------------|
| 12CA5 mouse monoclonal IgG to the HA epitope   | 1 $\mu$ g/ml<br>2 $\mu$ g/ml | Western blotting           | Roche                               |
| Rabbit anti-yeast BiP antiserum                | 4 $\mu$ g/ml                 | Immunoprecipitation        | Higashio et al. (2000) (a)          |
|                                                | 1: 1000 dilution             | Western blotting           |                                     |
|                                                | 1: 500 dilution              | Immunofluorescent staining |                                     |
| Chicken anti-GFP IgY                           | 1: 100 dilution              | Immunofluorescent staining | Ave Labs                            |
| Rabbit anti-GFP IgG                            | 1: 1000 dilution             | Western blotting           | MBL International Corporation       |
| HRP-conjugated goat antibody to mouse Igs      | 1: 150 dilution              | Immunoprecipitation        | Dako                                |
|                                                | 1: 1000 dilution             | Western blotting           |                                     |
| HRP-conjugated donkey antibody to rabbit IgG   | 1: 1000 dilution             | Western blotting           | GE Healthcare                       |
| FITC-conjugated goat antibody to mouse Igs     | 1: 100 dilution              | Immunofluorescent staining | Cappel                              |
| Cy5-conjugated donkey antibody to mouse IgG    | 1: 100 dilution              | Immunofluorescent staining | Jackson ImmunoResearch Laboratories |
| FITC-conjugated goat antibody to rabbit IgG    | 1: 100 dilution              | Immunofluorescent staining | Cappel                              |
| FITC-conjugated donkey antibody to chicken IgY | 1: 50 dilution               | Immunofluorescent staining | Jackson ImmunoResearch Laboratories |
| Cy3-conjugated donkey antibody to rabbit IgG   | 1: 200 dilution              | Immunofluorescent staining | Jackson ImmunoResearch Laboratories |

(a) Higashio, H., Y. Kimata, T. Kiriyama, A. Hirata, and K. Kohno (2000) *J. Biol. Chem.* 275: 17900–17908.
